# Supplementary material for: Ginsenoside Rg3 promotes regression from hepatic fibrosis through reducing inflammation-mediated autophagy signaling pathway
Source: PubMed Central journal article supplement (PMC7293224; doi:10.1038/s41419-020-2597-7), 2020-06-12

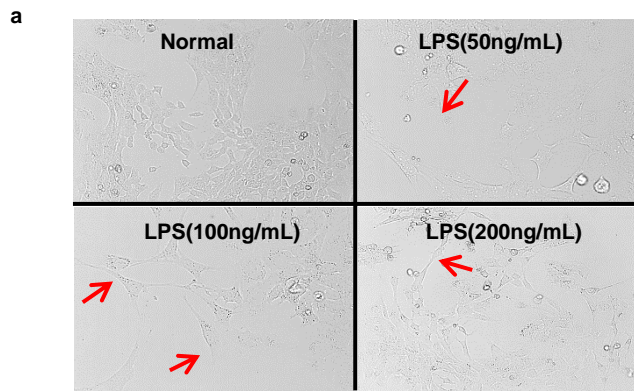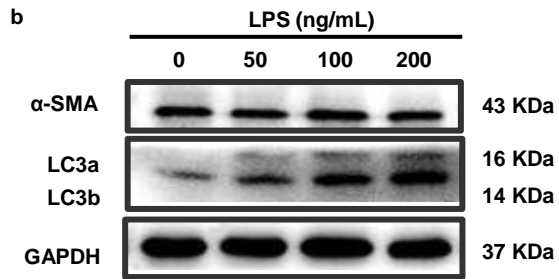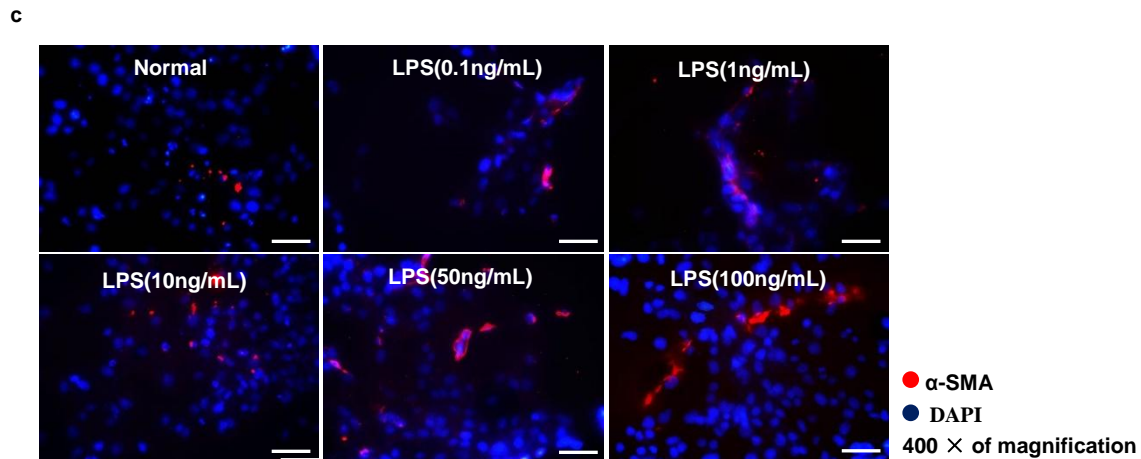

Supplement: 41419_2020_2597_MOESM3_ESM.pdf [file 41419_2020_2597_MOESM3_ESM.pdf]
